# Supplementary material
Source: publisher site journal article supplement (https://www.dovepress.com/article/530162)
Supplement: Supplementary file 1 [file Supplimentary%20Materials_1.docx]

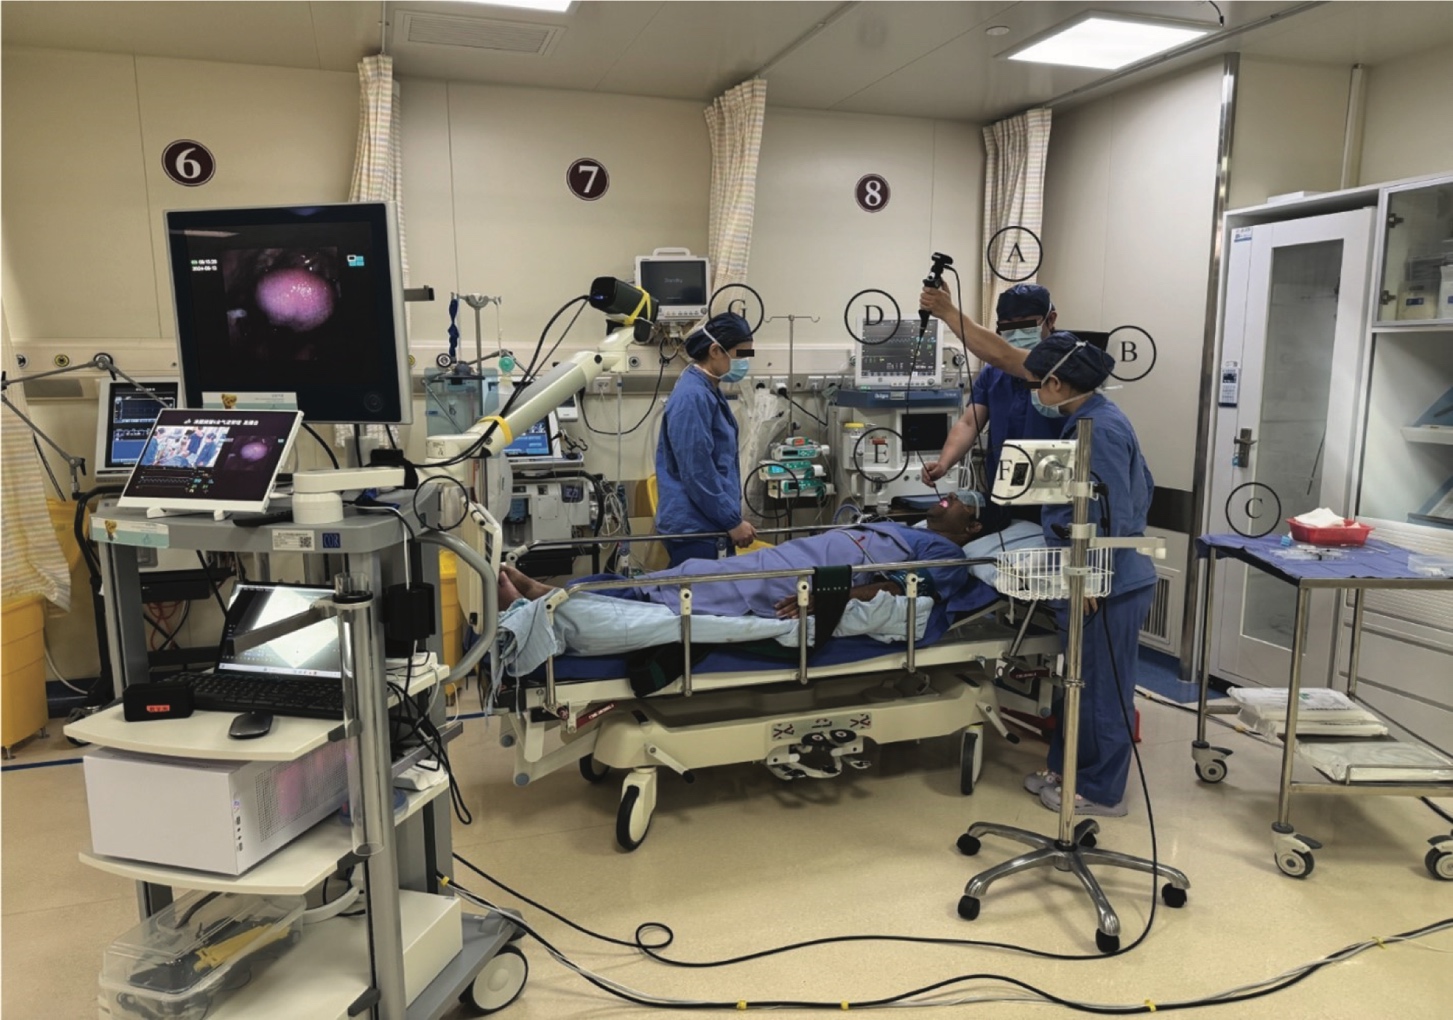


**Supplementary Figure 1**. **Ergonomics during awake flexible bronchoscopy intubation.** A) Operator. B) Assistant. C) Airway trolley. D) Patient monitor. E) Anesthesia machine, and suction. F) Video monitor. G) Second anesthetist. H) Fluid and pump. I) Recording system.


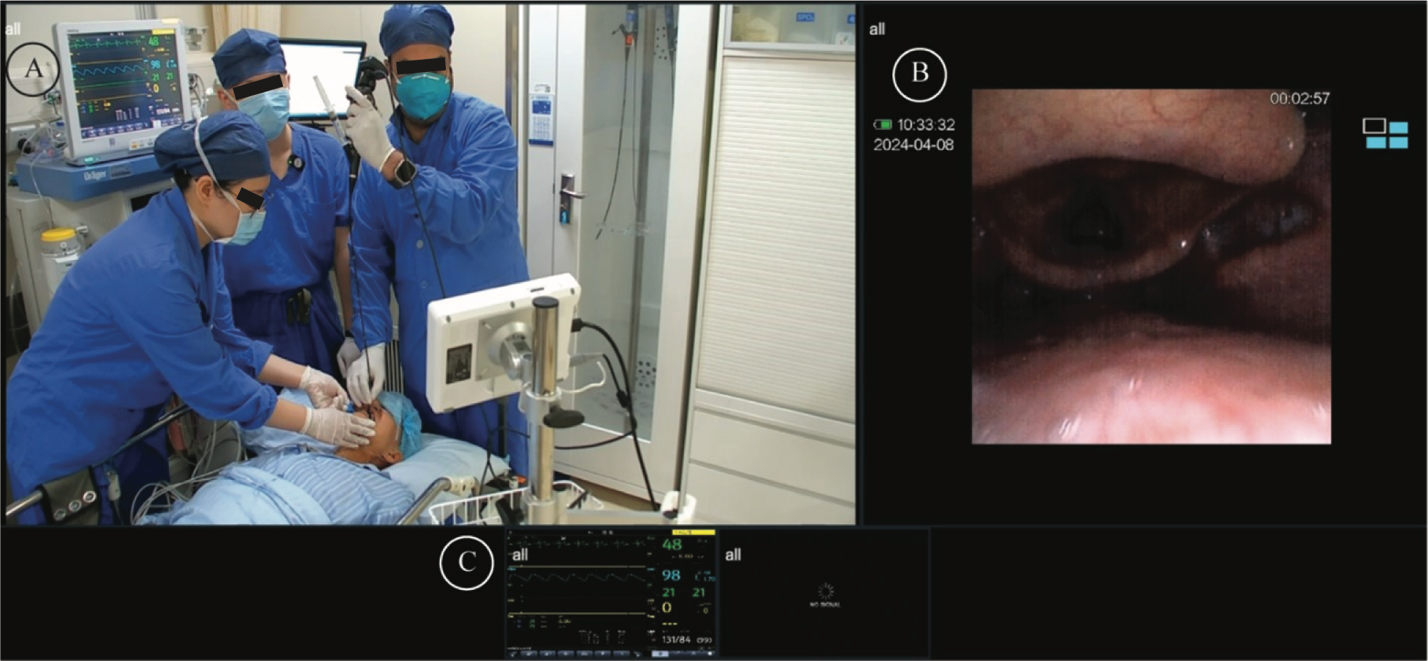


**Supplementary Figure 2.Still image of a video of awake flexible bronchoscopy** **intubation:** A) Outside view of the camera system. B) Endoscopic view of bronchoscope. C) Patient’s vital signs and hemodynamic parameters.

**Supplementary Table 1:** Hemodynamic changes of heart rate (HR), mean non-invasive blood pressure (MBP), and oxygen saturation (SpO2) during awake flexible bronchoscopy intubation.

|  | Overall | First Attempt Success  (n=128) | Multiple Attempts Success  (n=19) | P-Value |
| --- | --- | --- | --- | --- |
| (n=147) |
| HR(bpm) |  |  |  |  |
| T1 | 78.58 ±14.17 | 77.92±14.04 | 83.00±14.66 | 0.146 |
| T2 | 77.15±13.74 | 75.83±12.61 | 86.05±17.70 | 0.002 |
| T3 | 75.30±12.92 | 74.48±12.36 | 80.84±15.43 | 0.045 |
| T4 | 74.14±11.95 | 73.34±11.50 | 79.58±13.79 | 0.033 |
| T5 | 75.78±14.64 | 74.70±14.12 | 83.05±16.40 | 0.020 |
| T6 | 71.94±13.36 | 71.41±13.29 | 75.47±13.68 | 0.218 |
| MBP (mmHg) |  |  |  |  |
| T1 | 103.37±12.50 | 102.94±12.63 | 106.32±11.46 | 0.273 |
| T2 | 104.54±13.37 | 104.56±13.69 | 104.37±11.26 | 0.953 |
| T3 | 102.97±15.89 | 102.70±16.00 | 104.74±15.49 | 0.604 |
| T4 | 96.76±15.71 | 96.37±15.84 | 99.37±14.92 | 0.439 |
| T5 | 94.29±13.90 | 93.99±13.74 | 96.32±15.20 | 0.498 |
| T6 | 93.52±15.62 | 93.41±15.87 | 94.26±14.24 | 0.826 |
| SpO2 (%) |  |  |  |  |
| T1 | 98.87±1.64 | 98.86±1.70 | 98.95±1.18 | 0.828 |
| T2 | 99.03±1.75 | 99.10±1.59 | 98.58±2.63 | 0.227 |
| T3 | 98.90±1.51 | 98.97±1.46 | 98.42±1.80 | 0.141 |
| T4 | 97.86±4.16 | 97.78±4.40 | 98.42±1.80 | 0.533 |
| T5 | 97.85±2.74 | 97.88±2.82 | 97.68±2.14 | 0.778 |
| T6 | 97.55±2.94 | 97.54±3.03 | 97.63±2.29 | 0.899 |

Note: Values are presented as mean±SD. The time points were defined as T1, the beginning of the procedure; T2, after the application of local anesthetics to the oral cavity; T3, after local anesthetics were applied to the supraglottic region; T4, after local anesthetics were applied to the subglottic region; T5, after the successful insertion of the endotracheal tube; and T6, at the end of the procedure.

Abbreviation: HR, heart rate; MBP; mean non-invasive blood pressure; SpO2, Oxygen Saturation.

**Supplementary Table 2:** Sedation level variations during awake flexible bronchoscopy intubation.

|  | Overall | First Attempt Success  (n=128) | Multiple Attempts Success  (n=19) | *P*-Value |
| --- | --- | --- | --- | --- |
| (n=147) |
| T1 |  |  |  |  |
| Sedation Score |  |  |  | 1 |
| 1 | 101 (68.71%) | 88 (68.75%) | 13 (68.42%) |  |
| 2 | 46 (31.29%) | 40 (31.25%) | 6 (31.58%) |  |
| 3 | 0 | 0 | 0 |  |
| T2 |  |  |  |  |
| Sedation Score |  |  |  | 0.534 |
| 1 | 2 (1.36%) | 2 (1.56%) | 0 |  |
| 2 | 139 (94.56%) | 120 (93.75%) | 19 (100.00) |  |
| 3 | 6 (4.08%) | 6 (4.69%) | 0 |  |
| T3 |  |  |  |  |
| Sedation Score |  |  |  | 0.904 |
| 1 | 81(55.10%) | 70 (54.69%) | 11 (57.89%) |  |
| 2 | 65 (44.22%) | 57 (44.53%) | 8 (42.11%) |  |
| 3 | 1 (0.68%) | 1 (0.78%) | 0 |  |
| T4 |  |  |  |  |
| Sedation Score |  |  |  | 0.796 |
| 1 | 101 (68.71%) | 87 (67.97%) | 14 (73.68%) |  |
| 2 | 40 (27.21%) | 36 (28.12%) | 4 (21.05%) |  |
| 3 | 6 (4.08%) | 5 (3.91%) | 1 (5.26%) |  |
| T5 |  |  |  |  |
| Sedation Score |  |  |  | 0.449 |
| 1 | 25 (17.01%) | 20 (15.62%) | 5 (26.32%) |  |
| 2 | 108 (73.47%) | 95 (74.22%) | 13 (68.42%) |  |
| 3 | 14 (9.52%) | 13 (10.16%) | 1 (5.26%) |  |
| T6 |  |  |  |  |
| Sedation Score |  |  |  | 0.193 |
| 1 | 15 (10.20%) | 12 (9.38%) | 3 (15.79%) |  |
| 2 | 115 (78.23%) | 99 (77.34%) | 16 (84.21%) |  |
| 3 | 17 (11.56%) | 17 (13.28%) | 0 |  |

Note: Values are presented as n (%). The time points were defined as T1, the beginning of the procedure; T2, after the application of local anesthetics to the oral cavity; T3, after local anesthetics were applied to the supraglottic region; T4, after local anesthetics were applied to the subglottic region; T5, after the successful insertion of the endotracheal tube; and T6, at the end of the procedure.Sedation Score was defined as 1: Ramsay Sedation Score 1, 2: Ramsay Sedation Score 2, 3: Ramsay Sedation Score 3.
